# Supplementary material for: Mesoporous MnFe2O4 magnetic nanoparticles as a peroxidase mimic for the colorimetric detection of urine glucose
Source: Royal Society of Chemistry journal article supplement (doi:10.1039/d1ra05396e), 2021-01-01
Supplement: d1ra05396e1.pdf [file d1ra05396e1.pdf]

## Supporting Information

### **Mesoporous MnFe<sub>2</sub>O<sub>4</sub> magnetic nanoparticles as peroxidase mimic for colorimetric detection of urine glucose**

Ke Liu<sup>†</sup>, Jiaxing Su<sup>†</sup>, Jiangong Liang, Yuan Wu\*

State Key Laboratory of Agricultural Microbiology, College of Science, Huazhong Agricultural University, Wuhan 430070, People's Republic of China

<sup>†</sup> These authors contribute equally to this work.

Corresponding Author:

Tel.: +86-2787288505

E-mail: [yuanwu@mail.hzau.edu.cn](mailto:yuanwu@mail.hzau.edu.cn) (Yuan Wu)

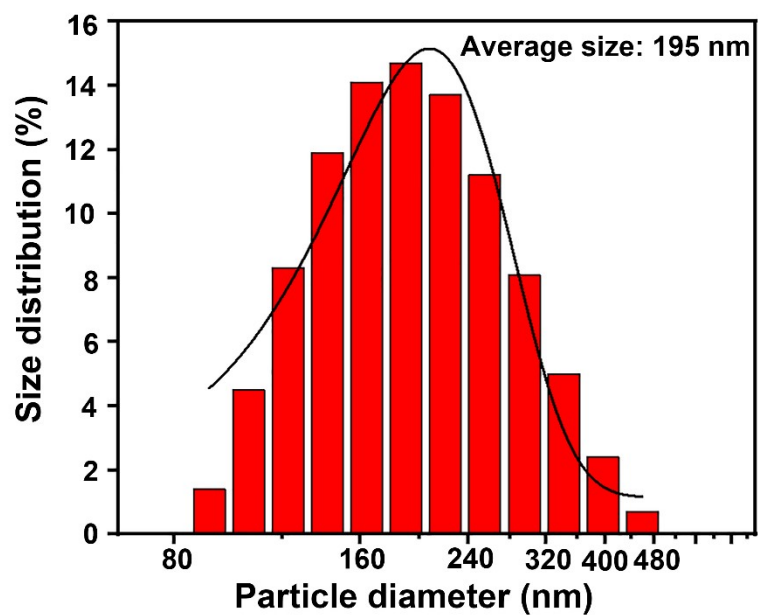

Fig. S1 Size distribution of DLS result for mMnFe<sub>2</sub>O<sub>4</sub> MNPs.

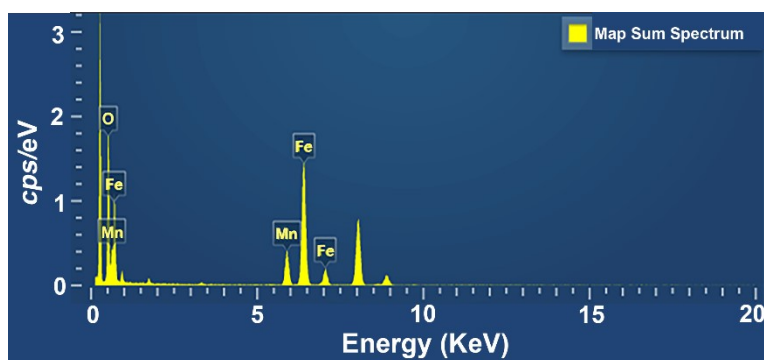

Fig. S2 EDS result for mMnFe<sub>2</sub>O<sub>4</sub> MNPs.

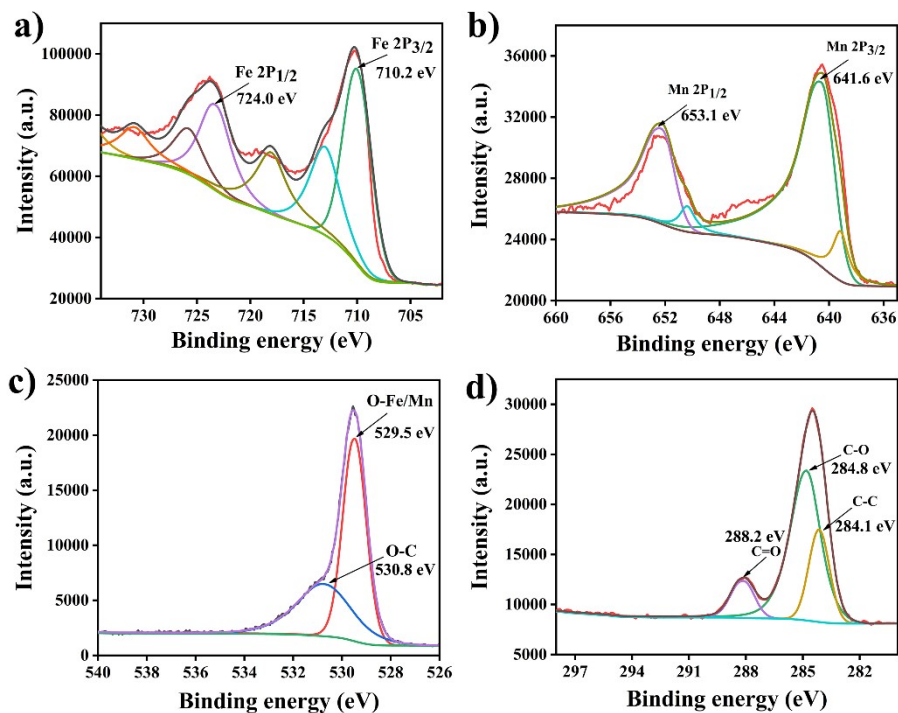

Fig. S3 XPS spectra of mMnFe<sub>2</sub>O<sub>4</sub> MNPs: a) Fe 2p spectrum; b) Mn 2p spectrum; c) O 1s spectrum; d) C 1s spectrum. For the spectrum of Fe 2p, the peaks at 710.2 eV and 724.0 eV are attributed to Fe 2p<sub>3/2</sub> and Fe 2p<sub>1/2</sub>, respectively, indicating the presence of Fe<sup>3+</sup>. For the spectrum of Mn 2p (Fig. S4c), the peaks of Mn 2p<sub>3/2</sub> and Mn 2p<sub>1/2</sub> of binding energy are observed at 641.6 eV and 653.1 eV, indicating that Mn exists in the style of Mn<sup>2+</sup>. For the spectrum of O 1s (Fig. S4d), the peak at 529.8 eV relates to the oxygen in the form of O<sup>2-</sup> in the nanocrystals. Form the fixed peak for the C 1s spectrum, the peaks at 288.2 eV, 284.8 eV and 284.1 eV are attributed to C 1s of C=O, C-O and C-C, which may be from organic molecules groups or CO<sub>2</sub> molecules.

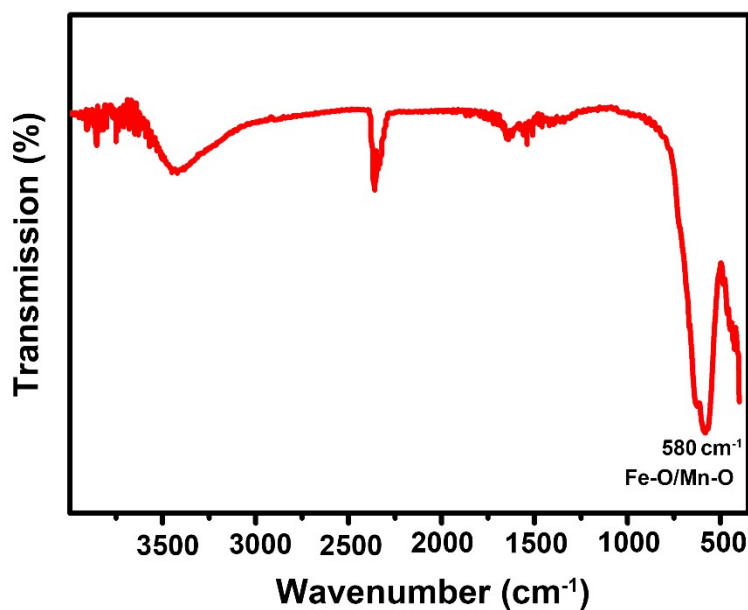

Fig. S4 FT-IR result of mMnFe<sub>2</sub>O<sub>4</sub> MNPs. The strong band around 580 cm<sup>-1</sup> corresponds to the metal-oxygen stretching vibration bonds (Fe-O/Mn-O) in the nanomaterials.

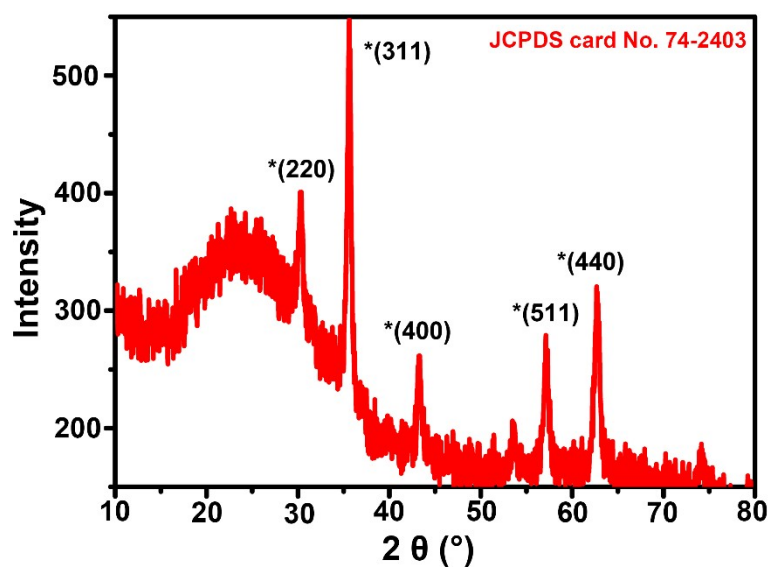

Fig. S5 XRD result for mMnFe<sub>2</sub>O<sub>4</sub> MNPs.

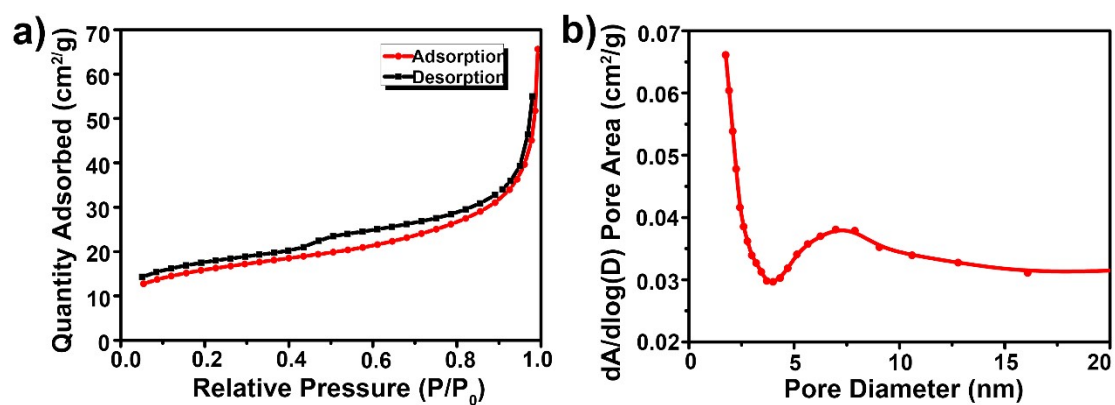

Fig. S6 a) N<sub>2</sub> adsorption-desorption result of mMnFe<sub>2</sub>O<sub>4</sub> MNPs; b) HK pore size distribution curve of mMnFe<sub>2</sub>O<sub>4</sub> MNPs.

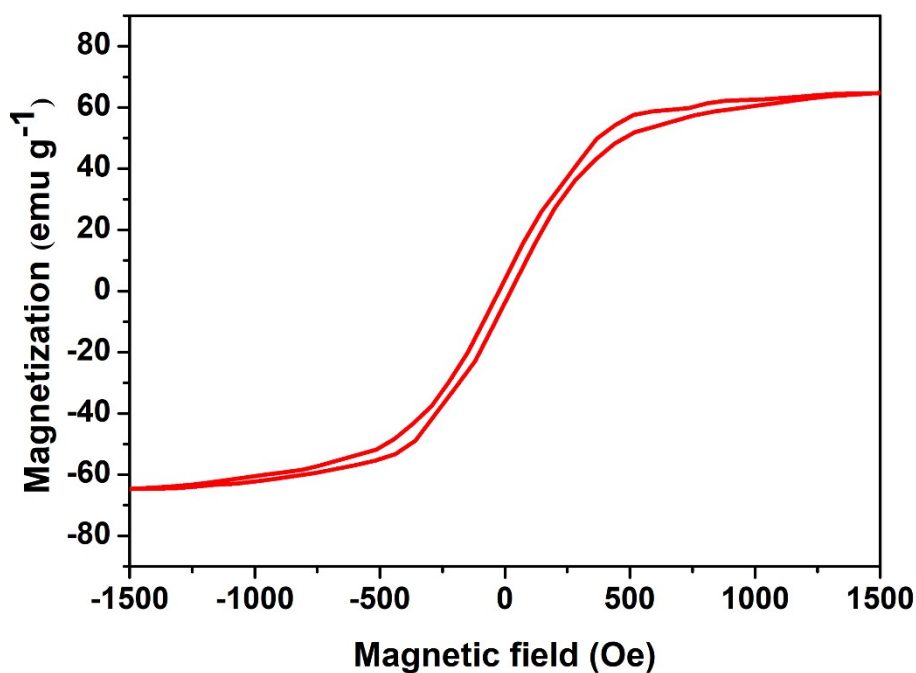

Fig. S7 Field dependent magnetization result of mMnFe<sub>2</sub>O<sub>4</sub> MNPs.

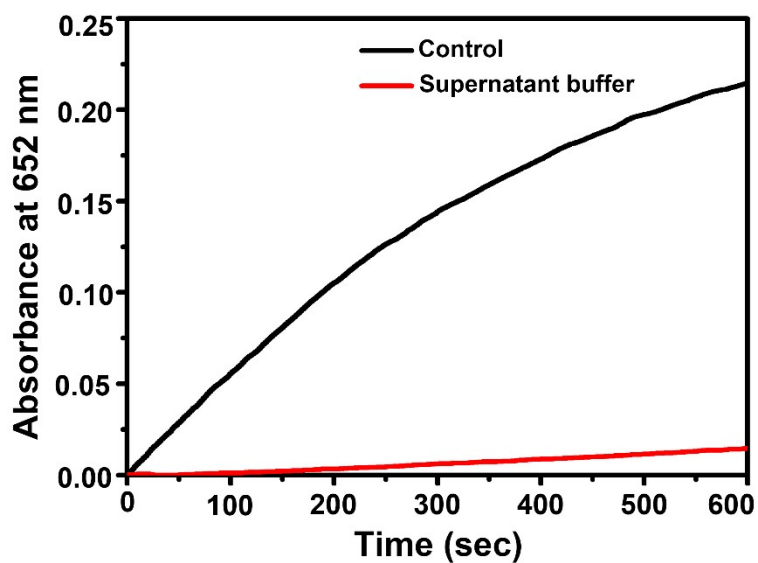

Fig. S8 Peroxidase-like activity of mMnFe<sub>2</sub>O<sub>4</sub> MNPs (black line) and mMnFe<sub>2</sub>O<sub>4</sub> MNPs incubated supernatant buffer (red line).

It is important to prove that the observed peroxidase-like activity was caused by mMnFe<sub>2</sub>O<sub>4</sub> MNPs rather than leached ions from mMnFe<sub>2</sub>O<sub>4</sub> MNPs in acidic solution. mMnFe<sub>2</sub>O<sub>4</sub> MNPs were incubated in the reaction buffer (pH 4.0) for 2 h, and then catalytic assay was performed with supernatant solution by removing mMnFe<sub>2</sub>O<sub>4</sub> MNPs with a magnet. As shown in Figure S8, no activity was observed with supernatant solution, confirming that the catalytic activity comes from the intact mMnFe<sub>2</sub>O<sub>4</sub> MNPs.

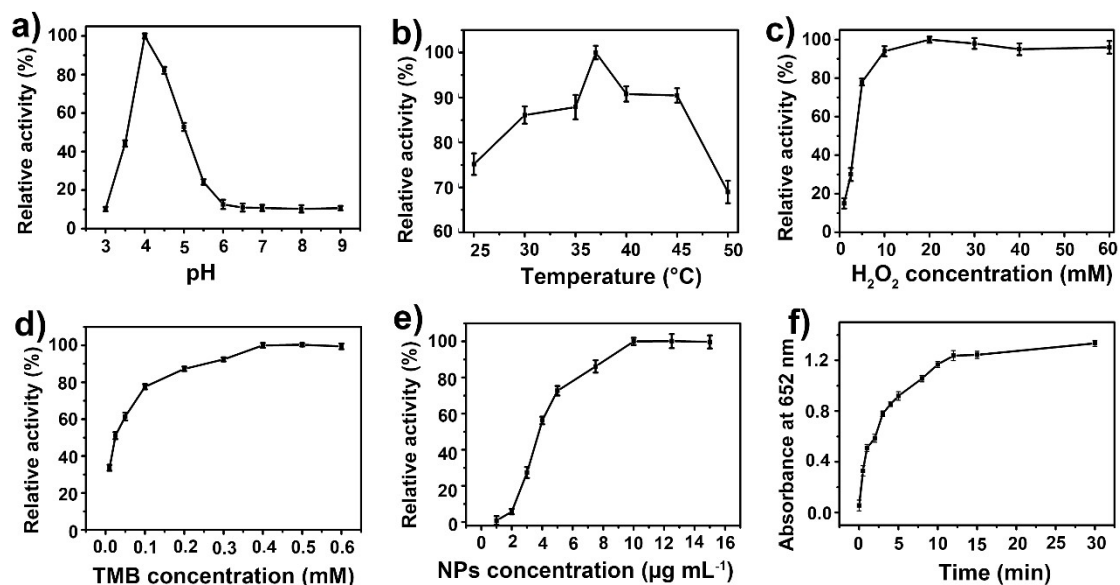

Fig. S9 Optimization of experimental parameters. a) pH optimization of mMnFe<sub>2</sub>O<sub>4</sub> MNPs with TMB and H<sub>2</sub>O<sub>2</sub> using absorbance at 652 nm; b) Incubation temperature optimization of mMnFe<sub>2</sub>O<sub>4</sub> MNPs with TMB and H<sub>2</sub>O<sub>2</sub> using absorbance at 652 nm; c) Optimization of H<sub>2</sub>O<sub>2</sub> concentration; d) Optimization of TMB concentration; e) Optimization of mMnFe<sub>2</sub>O<sub>4</sub> MNPs concentration; f) Reaction time optimization of mMnFe<sub>2</sub>O<sub>4</sub> MNPs with TMB and H<sub>2</sub>O<sub>2</sub> using absorbance at 652 nm.

### The explanation for Fig. 3d:

To evidence the  $\cdot\text{OH}$  radical mechanism, fluorescence test of terephthalic acid (TA) were performed to detect  $\cdot\text{OH}$  during the catalytic reaction, since TA can react with  $\cdot\text{OH}$  to generate highly fluorescent 2-hydroxy terephthalic acid. Fig. 3d shows that the fluorescence intensity of TA at 435 nm significantly increased after adding mMnFe<sub>2</sub>O<sub>4</sub> MNPs, whereas no fluorescence intensity was observed in the absence of H<sub>2</sub>O<sub>2</sub> or mMnFe<sub>2</sub>O<sub>4</sub> MNPs. These results demonstrate the catalytic mechanism of nanozymes is to bind and react with H<sub>2</sub>O<sub>2</sub> and then release hydroxyl radical ( $\cdot\text{OH}$ ) to react with TMB.

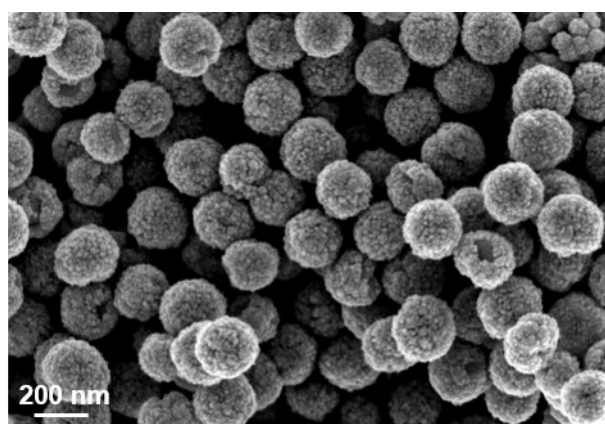

Fig. S10 SEM image of mMnFe<sub>2</sub>O<sub>4</sub> MNPs kept in pH 4.0 for 2 h.

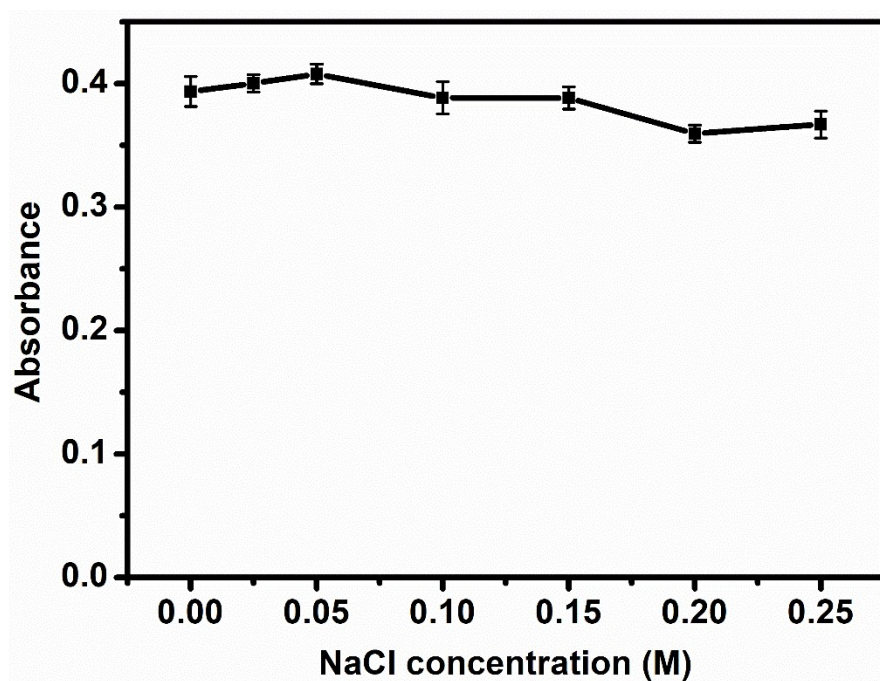

Fig. S11 Enzymatic-like reaction activity of mMnFe<sub>2</sub>O<sub>4</sub> MNPs treated with different concentration of NaCl.

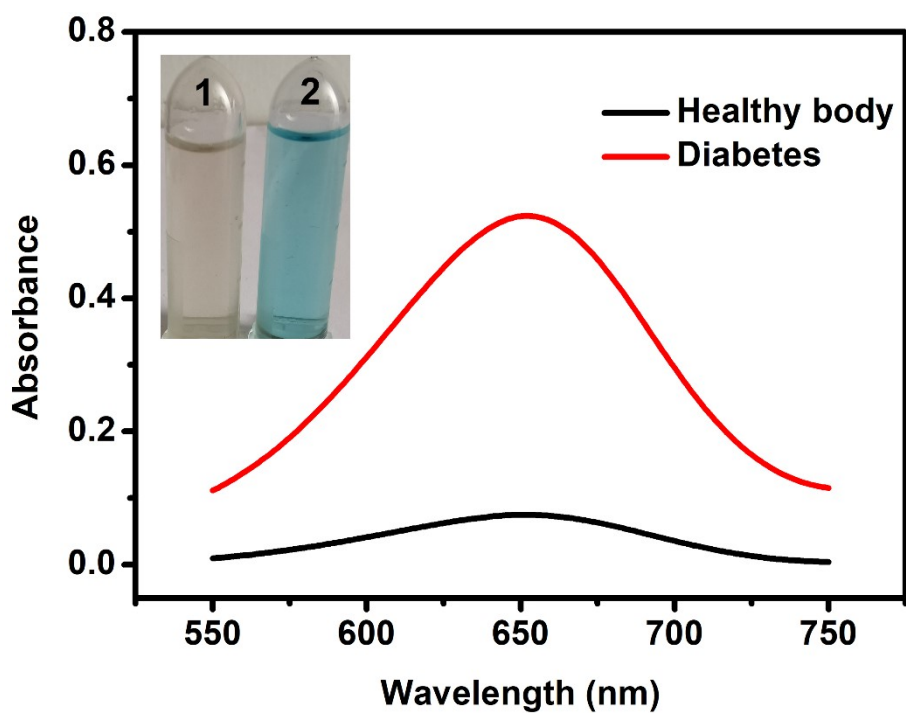

Fig. S12 UV-vis spectra of diluted urine samples from healthy body and diabetes. Inset: Images of colored production for urine samples. (1) healthy body and (2) diabetes.

Table S1. Comparison of the kinetic parameters<sup>a</sup> of mMnFe<sub>2</sub>O<sub>4</sub> MNPs nanozyme with other reported catalysts. TMB was the substrate.

| Catalysts                              | $K_m$ (mM <sup>-1</sup> ) | $V_{max}$ (10 <sup>-8</sup> M S <sup>-1</sup> ) | Ref.      |
|----------------------------------------|---------------------------|-------------------------------------------------|-----------|
| mMnFe <sub>2</sub> O <sub>4</sub> MNPs | 0.07                      | 27.8                                            | This work |
| HRP                                    | 0.43                      | 9.6                                             | [1]       |
| Hemin                                  | 0.75                      | 6.2                                             | [2]       |
| Fe <sub>3</sub> O <sub>4</sub> MNPs    | 0.10                      | 3.4                                             | [1]       |
| MoS <sub>2</sub> /GO                   | 0.10                      | 33.4                                            | [3]       |
| FePt                                   | 0.121                     | 21.1                                            | [4]       |
| ZnFe <sub>2</sub> O <sub>4</sub>       | 0.85                      | 13.3                                            | [5]       |
| Co <sub>3</sub> O <sub>4</sub>         | 0.037                     | 6.27                                            | [6]       |
| PtPd-Fe <sub>3</sub> O <sub>4</sub>    | 0.079                     | 9.36                                            | [7]       |

<sup>a</sup> The concentration of mMnFe<sub>2</sub>O<sub>4</sub> MNPs was 10 µg mL<sup>-1</sup>, H<sub>2</sub>O<sub>2</sub> concentration was 20 mM.

Table S2. Comparison of other nanozyme probes for glucose analysis.

| Nanozyme probes                                                 | Linear range  | LOD      | Ref.      |
|-----------------------------------------------------------------|---------------|----------|-----------|
| mMnFe <sub>2</sub> O <sub>4</sub> MNPs                          | 0.5-16 µM     | 0.7 µM   | This work |
| Fe <sub>3</sub> O <sub>4</sub> MNPs                             | 50-1000 µM    | 30 µM    | [8]       |
| WSe <sub>2</sub> nanosheets                                     | 10-60 µM      | 10 µM    | [9]       |
| Cu <sub>0.89</sub> Zn <sub>0.11</sub> O                         | 25-500 µM     | 1.5 µM   | [10]      |
| Nanosized CuS                                                   | 0.5-110 µM    | 0.13 µM  | [11]      |
| SO <sub>4</sub> <sup>2-</sup> /CoFe <sub>2</sub> O <sub>4</sub> | 0-300 µM      | 6.4 µM   | [12]      |
| CoFe <sub>2</sub> O <sub>4</sub>                                | 0.1-10 µM     | 0.024 µM | [13]      |
| ZnFe <sub>2</sub> O <sub>4</sub>                                | 1.25-18.75 µM | 0.3 µM   | [5]       |
| ZnO-ZnFe <sub>2</sub> O <sub>4</sub>                            | 1-23 µM       | 0.4 µM   | [14]      |

Table S3 Determination of glucose in urine from health body (n = 3) with the mMnFe<sub>2</sub>O<sub>4</sub> MNPs nanozyme probes.

| Added      | Total found | Recovery (%) | RSD (%) |
|------------|-------------|--------------|---------|
| ( $\mu$ M) | ( $\mu$ M)  | n = 3        | n = 3   |
| 1          | 0.93        | 93.4         | 4.5     |
| 10         | 10.65       | 106.5        | 7.4     |

## References

- [1] L. Z. Gao, J. Zhuang, L. Nie, J. B. Zhang, Y. Zhang, N. Gu, T. H. Wang, J. Feng, D. L. Yang, S. Perrett, and X. Y. Yan, *Nat. Nanotechnol.*, 2007, **2**, 577-583.
- [2] X. C. Lv and J. Weng, *Sci. Rep.*, 2013, **3**, 3285-3294.
- [3] J. Peng and J. Weng, *Biosens. Bioelectron.*, 2017, 89, 652–658.
- [4] Y. Liu, D. L. Purich, C. C. Wu, Y. Wu, T. Chen, C. Cui, L. Q. Zhang, S. Cansiz, W. J. Hou, Y. Y. Wang, S. Y. Yang, and W. H. Tan, *J. Am. Chem. Soc.*, 2015, **137**, 14952-14958.
- [5] L. Su, J. Feng, X. M. Zhou, C. L. Ren, H. H. Li, and X. G. Chen, *Anal. Chem.*, 2012, 84, 5753-5758.
- [6] J. Mu, Y. Wang, M. Zhao, L. Zhang, *Chem. Commun.*, 2012, 48, 2540–2542.
- [7] X. L. Sun, S. J. Guo, C. S. Chung, W. L. Zhu, and S. H. Sun, *Adv. Mater.*, 2013, 25, 132–136.
- [8] H. Wei, and E.K. Wang, *Anal. Chem.*, 2008, **80**, 2250-2254.
- [9] T.M. Chen, X.J. Wu, J.X. Wang, and G.W. Yang, *Nanoscale*, 2017, **9**, 11806-11813.
- [10] A.P. Nagvenkar and A. Gedanken, *ACS Appl. Mater. Interfaces*, 2016, **8**, 22301-22308.
- [11] X. H. Niu, Y. F. He, J. M. Pan, X. Li, F. X. Qiu, Y. S. Yan, L. B. Shi, H. L. Zhao, and M. B. Lan, *Anal. Chim. Acta*, 2016, **947**, 42-49.
- [12] X. L. Yin, P. Liu, X. C. Xu, J. M. Pan, X. Li, X. H. Niu, *Sens. Actuator B Chem.*, 2021, **328**, 129033-123041.
- [13] W. B. Shi, X. D. Zhang, S. H. He, and Y. M. Huang, *Chem. Commun.*, 2011, 47, 10785-10787.
- [14] M. G. Zhao, J. Y. Huang, Y. Zhou, X. H. Pan, H. P. He, Z. Z. Ye, and X. Q. Pan, *Chem. Commun.*, 2013, 49, 7656– 7658.
